# Supplementary material for: Durable cross-linked copolymer membranes based on poly(benzoxazine) and poly(2,5-benzimidazole) for use in fuel cells at elevated temperatures
Source: Royal Society of Chemistry journal article supplement (doi:10.1039/c2jm15497h), 2012-01-01
Supplement: c2jm15497h.pdf [file c2jm15497h.pdf]

## Journal of Materials Chemistry

Supplementary Information for the manuscript entitled:

### **Durable Cross-Linked Copolymer Membranes Based on Poly(benzoxazine) and Poly(2,5-benzimidazole) for Use in Fuel Cells at Elevated Temperatures**

Sung-Kon Kim, Taeyun Ko, Seong-Woo Choi,\* Jung Ock Park, Ki-Hyun Kim, Chanhok Pak, Hyuk Chang, and Jong-Chan Lee\*

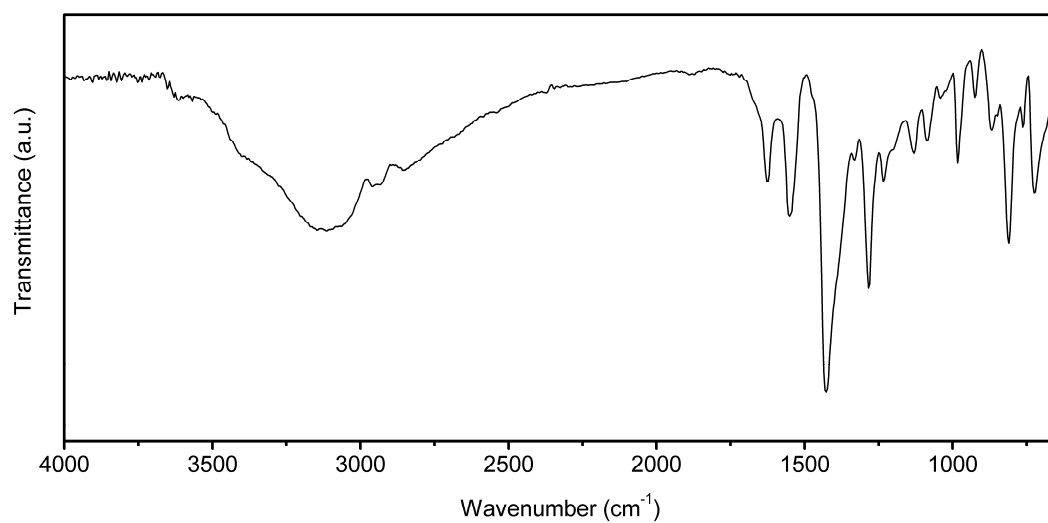

**Fig. S1.** ATR FT-IR of the extracts of PpF-co-ABPBI-65 membrane after immersion in a 85 wt% PA solution at 160 °C for 5 h.

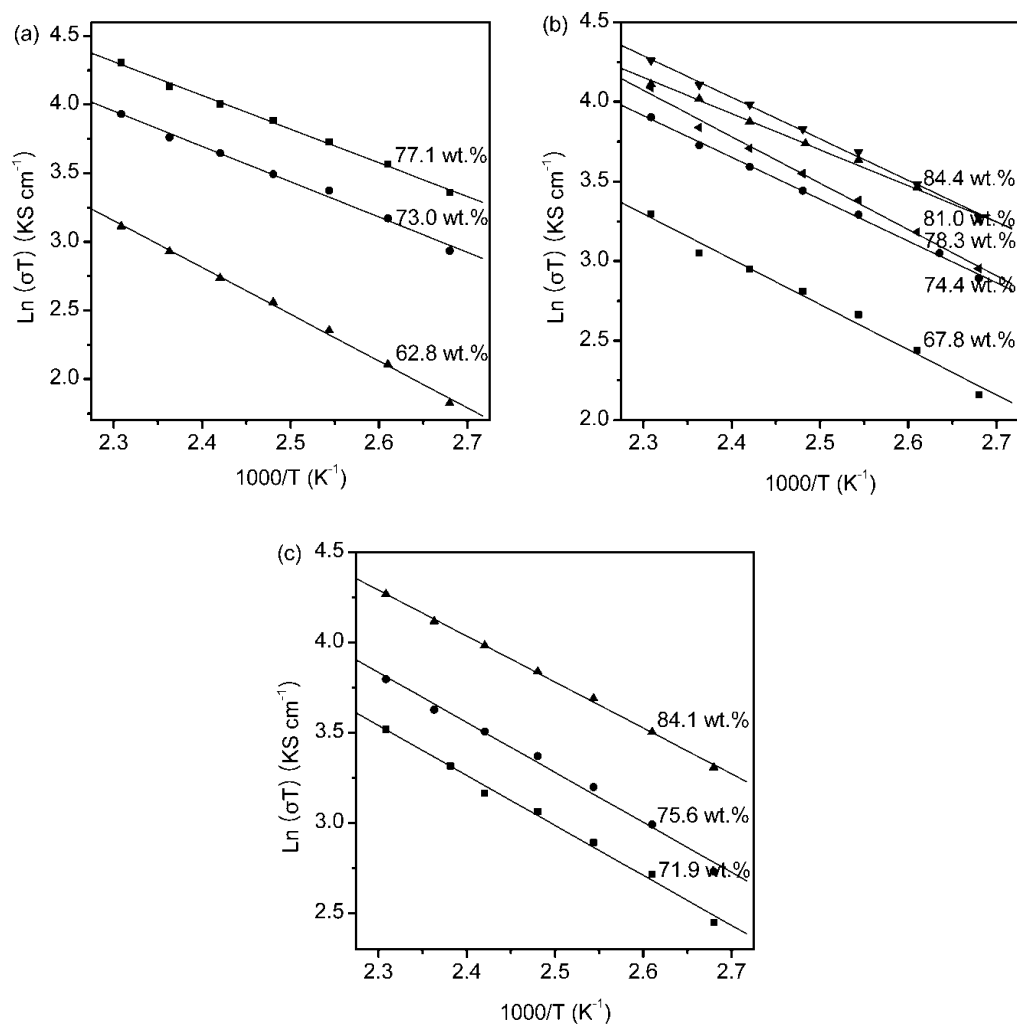

**Fig. S2.** Proton conductivities of (a) *PpF-co-ABPBI-65*, (b) *PpF-co-ABPBI-50*, and (c) *PpF-co-ABPBI-35* membranes as a function of temperature (100 ~ 160 °C) under anhydrous condition.
